# Supplementary material
Source: PubMed Central journal article supplement (PMC4299881)

## SUPPLEMENTARY MATERIAL

Grace T. Huang, Ioannis Tsamardinos, Naftali Kaminski, Panayiotis V. Benos

### **T-ReCS: a stable group feature selection method for analysis of omics data and clinical outcomes**

**Suppl Figure S1.** Pseudo-code of the T-RECS algorithm.

**Suppl Figure S2.** The network structure used in the generation of the synthetic data. The target variable (red) has three parents, three children, 25 connected ancestors and 25 connected descendants. Nodes 57 – 100 are unconnected variables.

**Suppl Figure S3.** The tree structure and clustered variable selection on the LGRC dataset.

**Suppl Figure S4.** T-ReCS results on the LGRC dataset. Network of interactions between the 40 T-ReCS selected miRNAs (blue triangles) and their putative mRNA targets (yellow circles).

MMPConReKS( $D; T; k; a, a_{Dep(X'; T|S)}, a_{Ind(X; T|X')}$ )

// **Input:** Data  $D$  with all variables  $\phi$ ; Target  $T$ ;  
maximum conditioning set size  $k$ ; threshold for  
single variable test  $a_{single}$ , thresholds for group  
variable tests  $a_{Dep(X'; T|S)}, a_{Ind(X; T|X')}$

// **Output:** set of single or group variables  $G$

1  $P = \text{ReKS}(D)$  // call ReKS to obtain  $P$ , a tree  
partition of the variables  $\phi$

2  $PC = \text{MMPC}(D; T; k; a_{single})$  // obtain  
predictive single variables  $PC$

3 **for** every variable  $X$  in  $PC$

4  $X' = X$  // initialize both current and parent  
node to the starting leaf node

5 **while** true

6  $X^c = X'$  // set current node to the former  
parent node

7  $X' = \text{ParentNode}_P(X')$  // define new  
parent node

// first group variable conditional  
independence test

6 **for** all  $S \subseteq PC \setminus \{x\}$ , s.t.  $|S| \leq k$

7 **if**  $Ind(X'; T|S)$ , or  $P(X'; T|S) > a_{Dep(X'; T|S)}$

8 **break** // do not replace  $X$  with this  
group variable

9 **end if**

10 **end for**

// second group variable conditional  
independence test

11 **if**  $Dep(X; T|X')$ , or  $P(X; T|X') < a_{Ind(X; T|X')}$

12 **break** // do not replace  $X$  with this  
group variable

13 **end if**

14 **end while**

15  $G = G \cup X^c$

16 **end for**

17 **return**  $G$

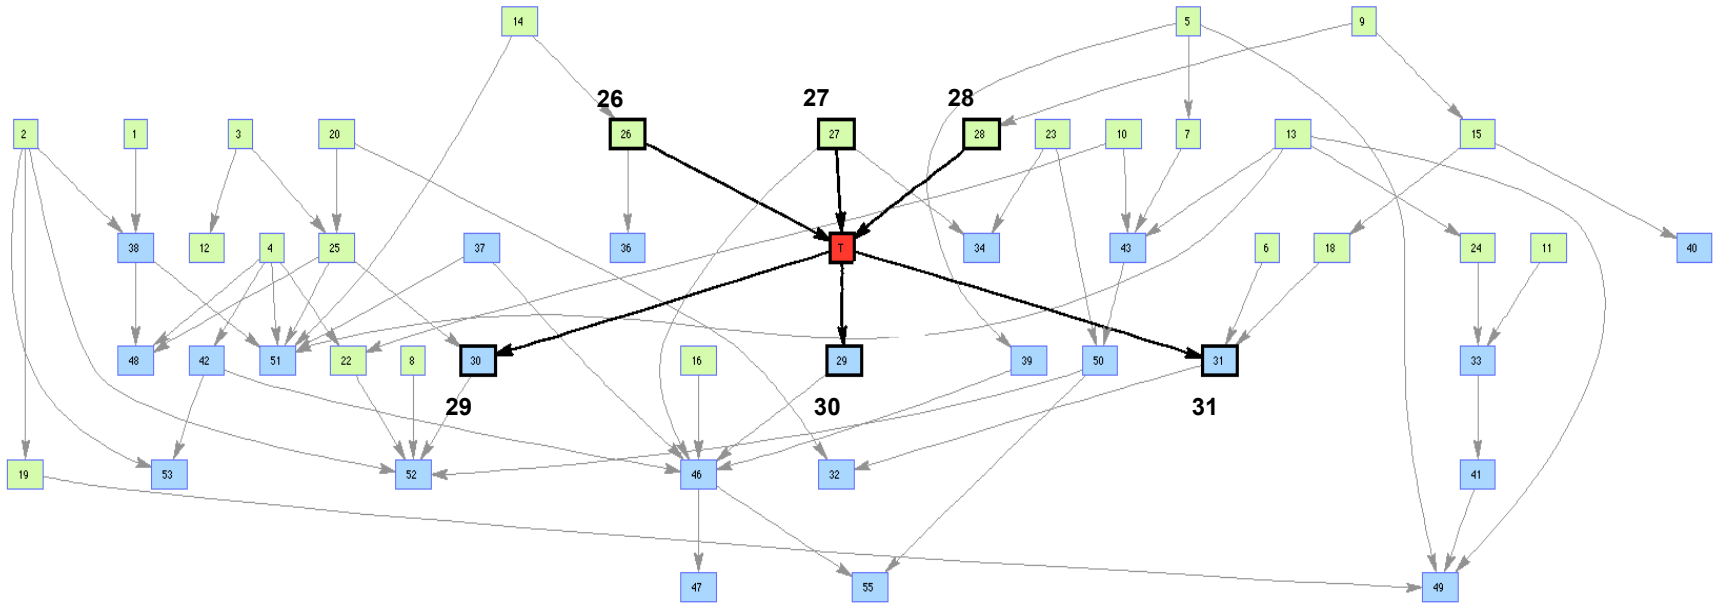

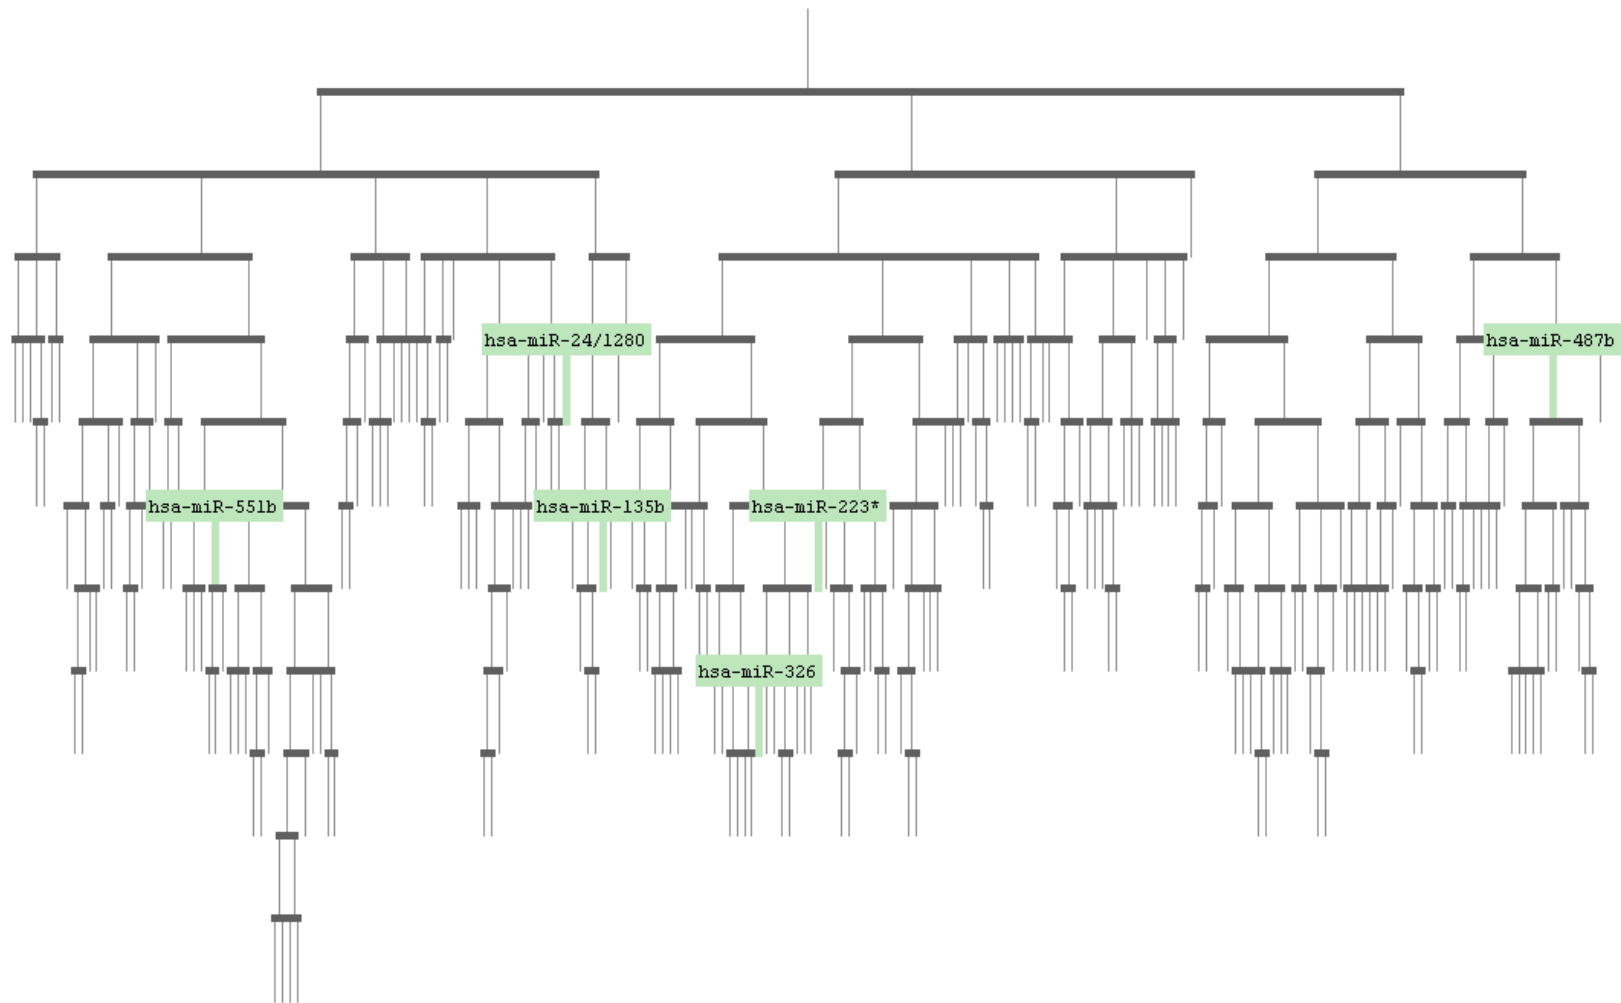

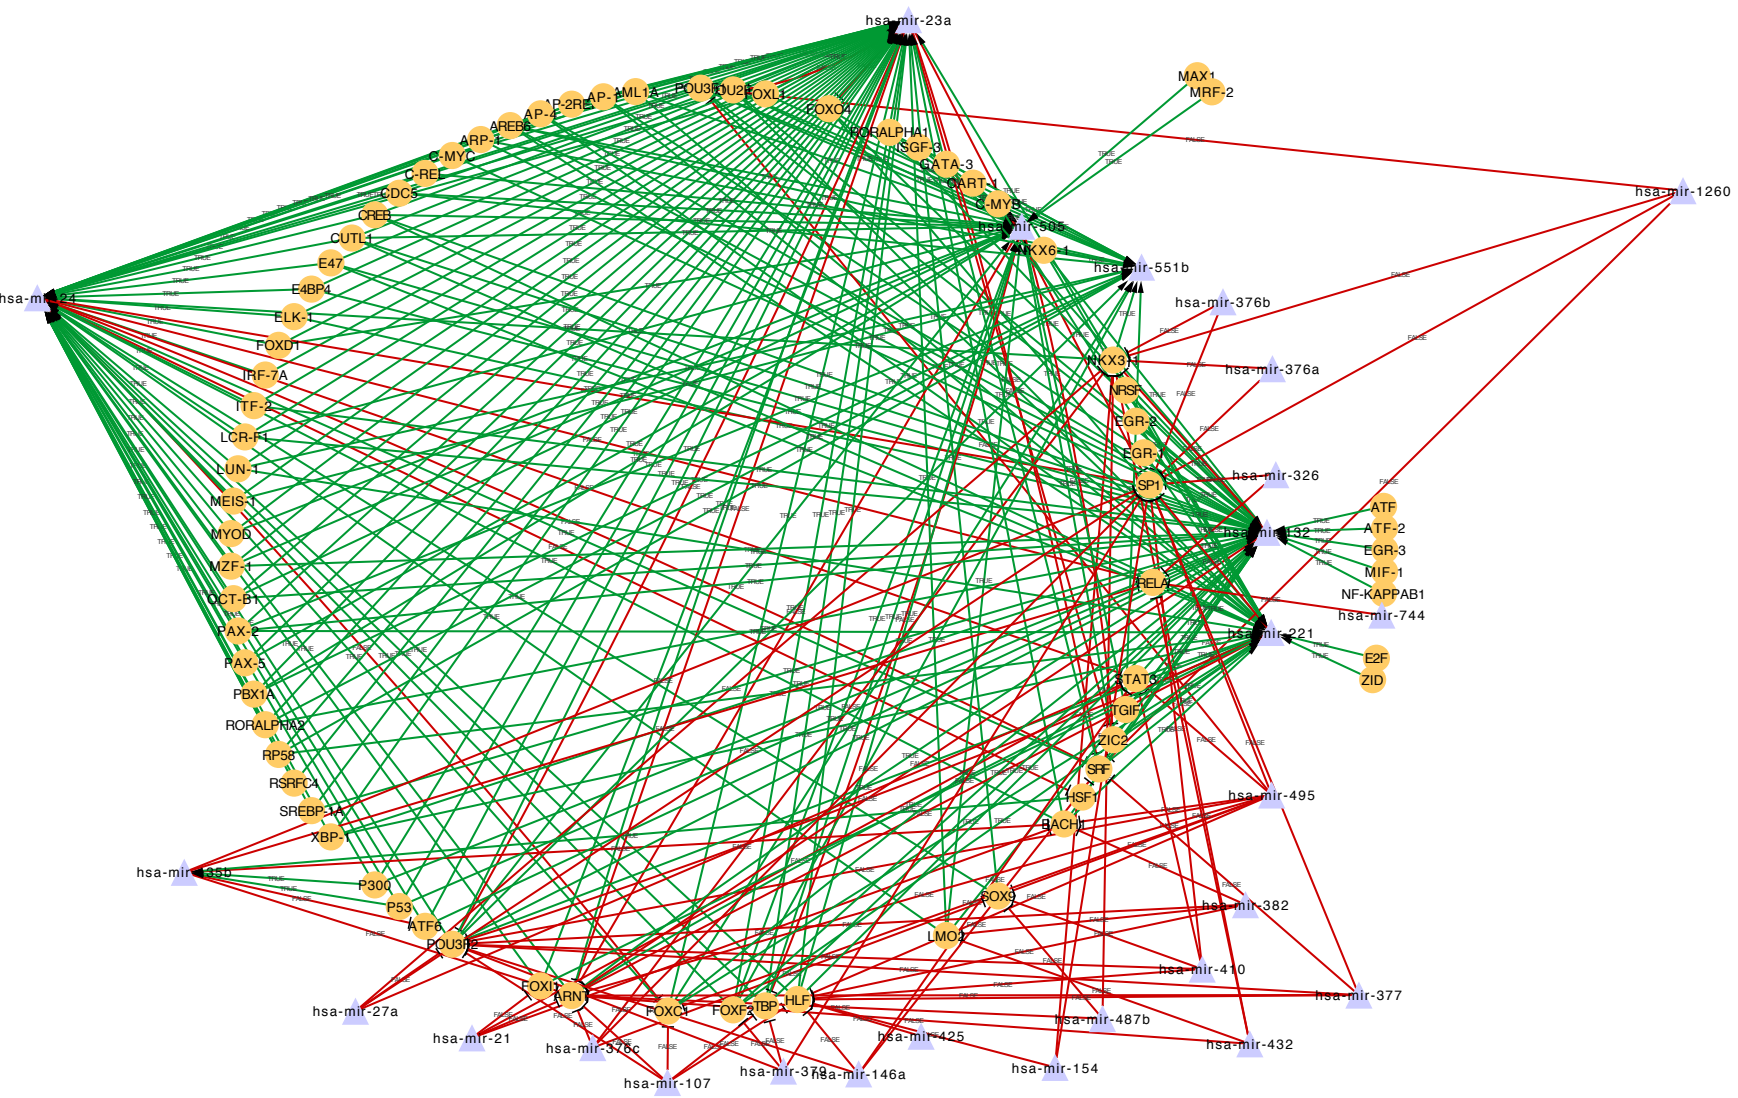

Supplement: NIHMS642148-supplement-Arrays.pdf [file NIHMS642148-supplement-Arrays.pdf]
